# Supplementary material
Source: publisher site journal article supplement (https://www.spandidos-publications.com/1795/downloadSupplementary)

Figure S1. Transfection efficiency and the effects on TGF- $\beta$  expression. (A) HRPTEpiCs were infected with Ad-ACE2 or transfected with siArkadia for 48 h. Reverse transcription-quantitative PCR revealed that ACE2 expression was increased in HRPTEpiCs transfected with Ad-ACE2, and Arkadia expression was decreased in HRPTEpiCs transfected with siArkadia. (B) HRPTEpiCs were treated with the ACE2 inhibitor DX600 for 48 h. Western blotting revealed that TGF- $\beta$  expression was increased in HRPTEpiCs stimulated with high glucose and further increased by DX600. (C) HRPTEpiCs were transfected with siArkadia and/or co-treated with high glucose and DX600 for 48 h. Western blotting revealed that TGF- $\beta$  expression was increased in HRPTEpiCs co-treated with high glucose and DX600, but decreased following siArkadia transfection. Results were normalized to  $\beta$ -actin expression. \* $P$ <0.05 compared with control cells;  $^{\$}$  $P$ <0.05 compared with high glucose-treated cells;  $^{\#}$  $P$ <0.05 compared with cells co-treated with high glucose and DX600. ACE2, angiotensin-converting enzyme 2;  $\alpha$ -SMA,  $\alpha$ -smooth muscle actin; CON, control; HG, high glucose; HRPTEpiCs, human renal proximal tubular epithelial cells; Ad-ACE2, adenoviruses overexpressing ACE2; siArkadia, small interfering RNA targeting Arkadia; TGF- $\beta$ , Transforming growth factor- $\beta$ .

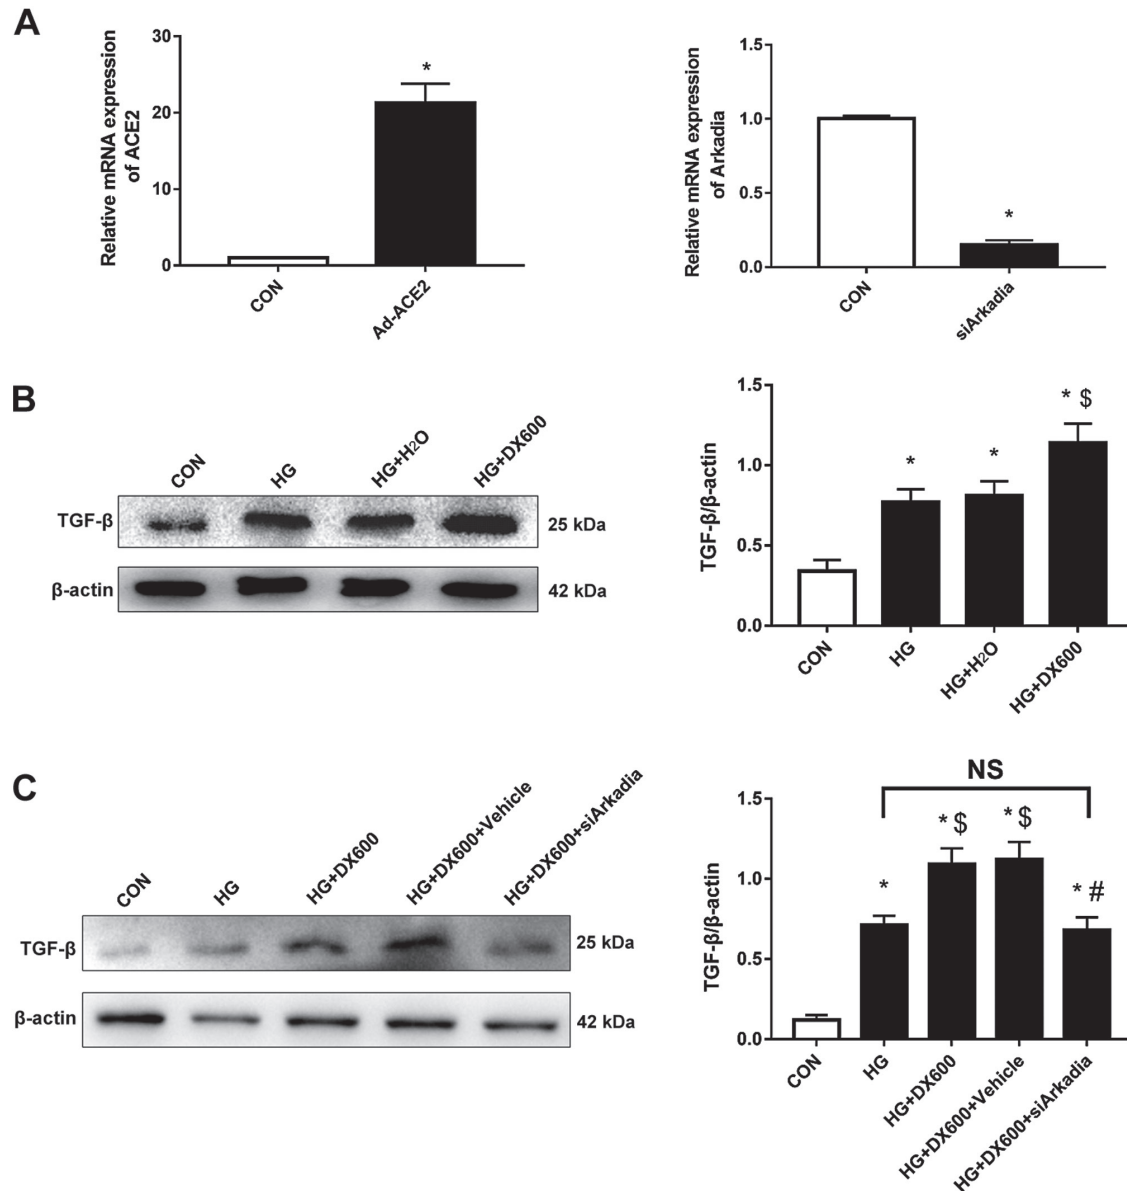

Supplement: Supplementary file 1 [file downloadSupplementary]
